# Supplementary material for: The Landscape of DNA Methylation Generates Insight Into Epigenetic Regulation of Differences Between Slow-Twitch and Fast-Twitch Muscles in Pseudocaranx dentex
Source: Frontiers journal article supplement (doi:10.3389/fmars.2022.916373), 2022-06-16
Supplement: Table_5.XLSX [file Table_5.XLSX]

## Sheet: Sheet1
Supplementary Table 5 Overlapped genes between DMGs and DEGs
Gene_name	Annonation
MCC	HUMAN Colorectal mutant cancer protein OS=Homo sapiens OX=9606 GN=MCC PE=1 SV=2//9.57244e-18
DGKZ	HUMAN Diacylglycerol kinase zeta OS=Homo sapiens OX=9606 GN=DGKZ PE=1 SV=3//0
PECAM1	RAT Platelet endothelial cell adhesion molecule OS=Rattus norvegicus OX=10116 GN=Pecam1 PE=1 SV=1//3.66517e-52
ASPA	DANRE Aspartoacylase OS=Danio rerio OX=7955 GN=aspa PE=2 SV=1//1.84437e-180
PRDM1	MOUSE PR domain zinc finger protein 1 OS=Mus musculus OX=10090 GN=Prdm1 PE=1 SV=1//1.09427e-67
NCKAP51	MOUSE Nck-associated protein 5-like OS=Mus musculus OX=10090 GN=Nckap5l PE=1 SV=1//1.63479e-07
GPR132	HUMAN Probable G-protein coupled receptor 132 OS=Homo sapiens OX=9606 GN=GPR132 PE=1 SV=1//7.24773e-26
ZNF503	DANRE Zinc finger protein 503 OS=Danio rerio OX=7955 GN=znf503 PE=1 SV=1//0
MB	SARCH Myoglobin OS=Sarda chiliensis OX=8231 GN=mb PE=2 SV=3//1.20114e-72
JAM2	HUMAN Junctional adhesion molecule B OS=Homo sapiens OX=9606 GN=JAM2 PE=1 SV=1//3.04016e-24
PPP1R3G	MOUSE Protein phosphatase 1 regulatory subunit 3G OS=Mus musculus OX=10090 GN=Ppp1r3g PE=1 SV=2//7.67872e-35
PCDH12	HUMAN Protocadherin-12 OS=Homo sapiens OX=9606 GN=PCDH12 PE=1 SV=1//0
LIPE	PIG Hormone-sensitive lipase OS=Sus scrofa OX=9823 GN=LIPE PE=2 SV=1//7.4894e-109
CDH5	HUMAN Cadherin-5 OS=Homo sapiens OX=9606 GN=CDH5 PE=1 SV=5//6.69075e-29
SLA2	MOUSE Src-like-adapter 2 OS=Mus musculus OX=10090 GN=Sla2 PE=1 SV=3//8.34412e-65
VGLL2	MOUSE Transcription cofactor vestigial-like protein 2 OS=Mus musculus OX=10090 GN=Vgll2 PE=1 SV=1//1.7434e-32
PGM5	MOUSE Phosphoglucomutase-like protein 5 OS=Mus musculus OX=10090 GN=Pgm5 PE=1 SV=2//0
IMPG2	HUMAN Interphotoreceptor matrix proteoglycan 2 OS=Homo sapiens OX=9606 GN=IMPG2 PE=1 SV=3//1.58813e-07
ETS1	CHICK Transforming protein p68/c-ets-1 OS=Gallus gallus OX=9031 GN=ETS1 PE=2 SV=1//0
SHANK3	HUMAN SH3 and multiple ankyrin repeat domains protein 3 OS=Homo sapiens OX=9606 GN=SHANK3 PE=1 SV=3//1.34368e-38
SEMA3F	HUMAN Semaphorin-3F OS=Homo sapiens OX=9606 GN=SEMA3F PE=2 SV=2//0
ABCC4	HUMAN Multidrug resistance-associated protein 4 OS=Homo sapiens OX=9606 GN=ABCC4 PE=1 SV=3//0
PLXND1	HUMAN Plexin-D1 OS=Homo sapiens OX=9606 GN=PLXND1 PE=1 SV=3//0
MAPK12	DANRE Mitogen-activated protein kinase 12 OS=Danio rerio OX=7955 GN=mapk12 PE=2 SV=1//0
EXOC3L1	DANRE Exocyst complex component 3-like protein OS=Danio rerio OX=7955 GN=exoc3l1 PE=2 SV=1//0
PLPP2	BOVIN Phospholipid phosphatase 2 OS=Bos taurus OX=9913 GN=PLPP2 PE=2 SV=1//2.60693e-102
PCDH12	HUMAN Protocadherin-12 OS=Homo sapiens OX=9606 GN=PCDH12 PE=1 SV=1//1.59003e-09
ADORA2A	HUMAN Adenosine receptor A2a OS=Homo sapiens OX=9606 GN=ADORA2A PE=1 SV=2//5.00281e-124
GBGT1	CHICK Globoside alpha-1,3-N-acetylgalactosaminyltransferase 1 OS=Gallus gallus OX=9031 GN=GBGT1 PE=2 SV=1//2.58121e-74
NIP7	TETNG 60S ribosome subunit biogenesis protein NIP7 homolog OS=Tetraodon nigroviridis OX=99883 GN=nip7 PE=3 SV=1//6.98603e-122
KLHL34	HUMAN Kelch-like protein 34 OS=Homo sapiens OX=9606 GN=KLHL34 PE=2 SV=1//2.05026e-30
PTPRB	HUMAN Receptor-type tyrosine-protein phosphatase beta OS=Homo sapiens OX=9606 GN=PTPRB PE=1 SV=3//1.77878e-41
LBX1	XENTR Transcription factor LBX1 OS=Xenopus tropicalis OX=8364 GN=lbx1 PE=2 SV=1//2.86352e-86
RGS4	PONAB Regulator of G-protein signaling 4 OS=Pongo abelii OX=9601 GN=RGS4 PE=2 SV=1//2.36056e-19
EPO	EPICO Erythropoietin OS=Epinephelus coioides OX=94232 GN=epo PE=2 SV=1//2.16959e-103
SEM3G	MOUSE Semaphorin-3G OS=Mus musculus OX=10090 GN=Sema3g PE=2 SV=1//0
SPECC1	HUMAN Cytospin-B OS=Homo sapiens OX=9606 GN=SPECC1 PE=1 SV=1//3.25173e-48
CLDN5	RAT Claudin-5 OS=Rattus norvegicus OX=10116 GN=Cldn5 PE=1 SV=2//1.45116e-67
ADT3	HUMAN ADP/ATP translocase 3 OS=Homo sapiens OX=9606 GN=SLC25A6 PE=1 SV=4//0
SNX16	HUMAN Sorting nexin-16 OS=Homo sapiens OX=9606 GN=SNX16 PE=1 SV=2//4.99486e-56
TRBM	CANLF Thrombomodulin OS=Canis lupus familiaris OX=9615 GN=THBD PE=2 SV=1//8.01084e-10
SOX13	MOUSE Transcription factor SOX-13 OS=Mus musculus OX=10090 GN=Sox13 PE=2 SV=4//2.25217e-135
RHG12	HUMAN Rho GTPase-activating protein 12 OS=Homo sapiens OX=9606 GN=ARHGAP12 PE=1 SV=1//7.52238e-13
CABL2	MOUSE CDK5 and ABL1 enzyme substrate 2 OS=Mus musculus OX=10090 GN=Cables2 PE=1 SV=2//4.63506e-24
GADPH	DANRE Glyceraldehyde-3-phosphate dehydrogenase OS=Danio rerio OX=7955 GN=gapdh PE=2 SV=2//0
IGFBP7	MOUSE Insulin-like growth factor-binding protein 7 OS=Mus musculus OX=10090 GN=Igfbp7 PE=1 SV=3//3.23641e-71
LMCD1	MOUSE LIM and cysteine-rich domains protein 1 OS=Mus musculus OX=10090 GN=Lmcd1 PE=1 SV=1//1.39487e-59
MYLK	BOVIN Myosin light chain kinase, smooth muscle OS=Bos taurus OX=9913 GN=MYLK PE=1 SV=1//0
APLNRB	DANRE Apelin receptor B OS=Danio rerio OX=7955 GN=aplnrb PE=1 SV=1//0
NEURL1B	MOUSE E3 ubiquitin-protein ligase NEURL1B OS=Mus musculus OX=10090 GN=Neurl1b PE=1 SV=1//0
HSPB11	DANRE Heat shock protein beta-11 OS=Danio rerio OX=7955 GN=hspb11 PE=2 SV=2//1.29347e-85
MCTP1	HUMAN Multiple C2 and transmembrane domain-containing protein 1 OS=Homo sapiens OX=9606 GN=MCTP1 PE=2 SV=2//9.57447e-37
LNX2	HUMAN Ligand of Numb protein X 2 OS=Homo sapiens OX=9606 GN=LNX2 PE=1 SV=1//0
OVCH2	XENLA Ovochymase-2 OS=Xenopus laevis OX=8355 GN=ovch2 PE=1 SV=1//8.45682e-22
EXT1C	DANRE Exostosin-1c OS=Danio rerio OX=7955 GN=ext1c PE=2 SV=1//0
TNNI2	RABIT Troponin I, fast skeletal muscle OS=Oryctolagus cuniculus OX=9986 GN=TNNI2 PE=1 SV=3//2.20155e-20
FBLN4	MOUSE EGF-containing fibulin-like extracellular matrix protein 2 OS=Mus musculus OX=10090 GN=Efemp2 PE=1 SV=1//0
SPRYD3	HUMAN SPRY domain-containing protein 3 OS=Homo sapiens OX=9606 GN=SPRYD3 PE=1 SV=2//6.54399e-163
MYO1C	LITCT Unconventional myosin-Ic OS=Lithobates catesbeiana OX=8400 GN=Myo1c PE=2 SV=1//0
SCN4AA	TETNG Sodium channel protein type 4 subunit alpha A OS=Tetraodon nigroviridis OX=99883 GN=scn4aa PE=3 SV=2//6.76269e-07
HACD4	MOUSE Very-long-chain (3R)-3-hydroxyacyl-CoA dehydratase 4 OS=Mus musculus OX=10090 GN=Hacd4 PE=2 SV=2//2.69259e-45
CLK4	HUMAN Dual specificity protein kinase CLK4 OS=Homo sapiens OX=9606 GN=CLK4 PE=1 SV=1//6.47389e-67
PRKAG2	MOUSE 5&apos;-AMP-activated protein kinase subunit gamma-2 OS=Mus musculus OX=10090 GN=Prkag2 PE=1 SV=2//2.25589e-141
SEMA5A	HUMAN Semaphorin-5A OS=Homo sapiens OX=9606 GN=SEMA5A PE=1 SV=3//0
F26	LITCT 6-phosphofructo-2-kinase/fructose-2,6-bisphosphatase OS=Lithobates catesbeiana OX=8400 PE=2 SV=1//4.12274e-129
ABCC1	CHICK Multidrug resistance-associated protein 1 OS=Gallus gallus OX=9031 GN=ABCC1 PE=2 SV=1//0
CACNG6	RAT Voltage-dependent calcium channel gamma-6 subunit OS=Rattus norvegicus OX=10116 GN=Cacng6 PE=2 SV=1//1.10485e-43
COL18A1	HUMAN Collagen alpha-1(XVIII) chain OS=Homo sapiens OX=9606 GN=COL18A1 PE=1 SV=5//3.73297e-46
WBP1L	HUMAN WW domain binding protein 1-like OS=Homo sapiens OX=9606 GN=WBP1L PE=1 SV=2//1.08106e-72
RLC	CHICK Myosin regulatory light chain 2, skeletal muscle isoform OS=Gallus gallus OX=9031 GN=MYLPF PE=1 SV=2//3.15854e-94
MYOCD	RAT Myocardin OS=Rattus norvegicus OX=10116 GN=Myocd PE=1 SV=2//2.49352e-06
USP2	CHICK Ubiquitin carboxyl-terminal hydrolase 2 OS=Gallus gallus OX=9031 GN=USP2 PE=2 SV=1//0
FITM1	DANRE Fat storage-inducing transmembrane protein 1 OS=Danio rerio OX=7955 GN=fitm1 PE=2 SV=1//4.40642e-93
MKL1	XENLA MKL/myocardin-like protein 1 OS=Xenopus laevis OX=8355 GN=mkl1 PE=2 SV=1//7.34929e-07
TNNT3	COTJA Troponin T, fast skeletal muscle isoforms OS=Coturnix japonica OX=93934 GN=TNNT3 PE=2 SV=4//6.67615e-51
TXNIP	MOUSE Thioredoxin-interacting protein OS=Mus musculus OX=10090 GN=Txnip PE=1 SV=1//1.00649e-106
SIX1B	DANRE Homeobox protein six1b OS=Danio rerio OX=7955 GN=six1b PE=1 SV=1//0
R3HDM1	HUMAN R3H domain-containing protein 1 OS=Homo sapiens OX=9606 GN=R3HDM1 PE=1 SV=3//8.58688e-39
PPEF2	HUMAN Serine/threonine-protein phosphatase with EF-hands 2 OS=Homo sapiens OX=9606 GN=PPEF2 PE=1 SV=2//0
SEM4B	HUMAN Semaphorin-4B OS=Homo sapiens OX=9606 GN=SEMA4B PE=1 SV=3//0
AT11A	HUMAN Probable phospholipid-transporting ATPase IH OS=Homo sapiens OX=9606 GN=ATP11A PE=1 SV=3//0
EFR3A	MOUSE Protein EFR3 homolog A OS=Mus musculus OX=10090 GN=Efr3a PE=1 SV=1//1.11335e-92
